# Supplementary material for: Inference of Transmission Network Structure from HIV Phylogenetic Trees
Source: PubMed Central journal article supplement (PMC5279806; doi:10.1371/journal.pcbi.1005316), 2017-01-13
Supplement: pcbi.1005316.s001.pdf [file pcbi.1005316.s001.pdf]

# Inference of transmission network structure from HIV phylogenetic trees

Federica Giardina<sup>1,2\*</sup>, Ethan Obie Romero-Severson<sup>2</sup>, Jan Albert<sup>3,4</sup>, Tom Britton<sup>1</sup>, Thomas Leitner<sup>2</sup>

**1 Department of Mathematics, Stockholm University, Stockholm, Sweden**

**2 Theoretical Biology and Biophysics Group, Los Alamos National Laboratory, Los Alamos, NM**

**3 Department of Microbiology, Tumor and Cell Biology, Karolinska Institute, Stockholm, Sweden**

**4 Department of Clinical Microbiology, Karolinska University Hospital, Stockholm, Sweden**

\* E-mail: federica@math.su.se

## Supplementary information

### Probability to escape infection

We calculated the probability to escape infection from a neighbour,  $\pi$ , as the exponential of the total infectious pressure. Let  $X$  denote the time to diagnosis (or death from AIDS if never diagnosed) and assume that  $X$  follows an exponential distribution with rate parameter  $\gamma$ , i.e.  $X \sim \text{Exp}(\gamma)$ . In the first model specification (constant infectivity)  $\pi$  can be written as  $\pi = \mathbb{E}[\text{Exp}(-\lambda X)]$  where  $\lambda$  is the constant transmission rate. Therefore,  $\pi = \mathbb{E}[\text{Exp}(-\lambda X)] = \int_0^{+\infty} \gamma e^{-\gamma x} (e^{-\lambda x}) dx = \frac{\gamma}{\gamma + \lambda}$ .

In the second model specification, which included stage-varying infectivity, let  $t_1$  denote the deterministic time spent in the first stage (acute phase),  $T_2$  the random time spent in the second stage (chronic phase), represented by an exponential random variable with rate parameter  $\beta$ , i.e.  $T_2 \sim \text{Exp}(\beta)$ , and  $t_3$  the time spent in the pre-AIDS stage. Here, the transmission rates in each of the three infection stages are  $\lambda_1, \lambda_2$  and  $\lambda_3$ , respectively. Thus, the infectious pressure has a different expression depending on when the diagnosis occurs (in the acute, chronic or pre-AIDS stage). The probability  $\pi$  is the mean of the infectious pressure calculated over  $X$  and  $T_2$ . We have:  $\pi = \mathbb{E}[\text{Exp}(-\lambda_1 \mathbb{1}_{X < t_1} - (\lambda_1 t_1 + \lambda_2 (X - t_1)) \mathbb{1}_{t_1 < X < t_1 + T_2} - (\lambda_1 t_1 + \lambda_2 T_2 + \lambda_3 (X - t_1 - T_2)) \mathbb{1}_{X > t_1 + T_2})] = \int_0^{t_1} \gamma e^{-\gamma x} (e^{-\lambda_1 x}) dx + \int_0^{\infty} \int_{t_1}^{t_1 + t_2} \beta e^{-\beta t_2} \gamma e^{-\gamma x} e^{-(\lambda_1 t_1 + \lambda_2 (x - t_1))} dt_2 dx + \int_0^{\infty} \int_{t_1 + t_2}^{\infty} \beta e^{-\beta t_2} \gamma e^{-\gamma x} e^{-(\lambda_1 t_1 + \lambda_2 t_2 + \lambda_3 (x - t_1 - t_2))} dt_2 dx = -\frac{\gamma}{\gamma + \lambda_1} (e^{-t_1(\gamma + \lambda_1)} - 1) + \frac{\gamma}{\beta + \gamma + \lambda_2} e^{-t_1(\gamma + \lambda_1)} + \frac{\beta}{\beta + \gamma + \lambda_2} \frac{\gamma}{\gamma + \lambda_3} e^{-t_1(\gamma + \lambda_1)} = -\gamma e^{-t_1(\gamma + \lambda_1)} \left( \frac{1 - e^{t_1(\gamma + \lambda_1)}}{\gamma + \lambda_1} - \frac{1}{\beta + \gamma + \lambda_2} - \frac{\beta}{(\beta + \gamma + \lambda_2)(\gamma + \lambda_3)} \right)$

Equating the two expressions of  $\pi$  under the two different model specifications, we can calculate the three stage dependent transmission rates  $\lambda_1, \lambda_2$  and  $\lambda_3$  corresponding to a given  $\lambda$ . For example, let us assume:

$t_1 = 30, \beta = 1/(365 * 8), \gamma = 1/(2.8 * 365), \lambda_1 = 100\lambda_2, \lambda_3 = 100\lambda_2, \lambda = 0.001$ . We obtain:  $\lambda_2 = 0.000121$
