# Supplementary material for: Inference of Transmission Network Structure from HIV Phylogenetic Trees
Source: PubMed Central journal article supplement (PMC5279806; doi:10.1371/journal.pcbi.1005316), 2017-01-13
Supplement: pcbi.1005316.s010.pdf [file pcbi.1005316.s010.pdf]

# Inference of transmission network structure from HIV phylogenetic trees

Federica Giardina<sup>1,2\*</sup>, Ethan Obie Romero-Severson<sup>2</sup>, Jan Albert<sup>3,4</sup>, Tom Britton<sup>1</sup>, Thomas Leitner<sup>2</sup>

**1 Department of Mathematics, Stockholm University, Stockholm, Sweden**

**2 Theoretical Biology and Biophysics Group, Los Alamos National Laboratory, Los Alamos, NM**

**3 Department of Microbiology, Tumor and Cell Biology, Karolinska Institute, Stockholm, Sweden**

**4 Department of Clinical Microbiology, Karolinska University Hospital, Stockholm, Sweden**

\* E-mail: federica@math.su.se

## Supplementary information

**S1 Tab. Effect of increased rewiring probability ( $\rho$ ) on network identification.**

| $\rho = 0.01$ | WS   | ER   | BA   |
|---------------|------|------|------|
| WS            | 0.99 | 0.01 | 0.00 |
| ER            | 0.03 | 0.76 | 0.21 |
| BA            | 0.01 | 0.21 | 0.78 |
| $\rho = 0.1$  | WS   | ER   | BA   |
| WS            | 0.95 | 0.05 | 0.00 |
| ER            | 0.11 | 0.70 | 0.19 |
| BA            | 0.01 | 0.19 | 0.80 |
| $\rho = 0.25$ | WS   | ER   | BA   |
| WS            | 0.75 | 0.16 | 0.09 |
| ER            | 0.16 | 0.63 | 0.21 |
| BA            | 0.06 | 0.15 | 0.79 |
| $\rho = 0.5$  | WS   | ER   | BA   |
| WS            | 0.65 | 0.17 | 0.18 |
| ER            | 0.19 | 0.57 | 0.24 |
| BA            | 0.10 | 0.21 | 0.69 |
